# Supplementary material
Source: PubMed Central journal article supplement (PMC6052357)
Supplement: JZUSB19-0535-ESM.pdf [file JZUSB19-0535-ESM.pdf]

**Supplemental Materials:**

<https://doi.org/10.1631/jzus.B1700195>

## **A biomechanical case study on the optimal orthodontic force on the maxillary canine tooth based on finite element analysis<sup>\*#</sup>**

Jian-lei WU<sup>1</sup>, Yun-feng LIU<sup>†#1</sup>, Wei PENG<sup>1</sup>, Hui-yue DONG<sup>2</sup>, Jian-xing ZHANG<sup>3</sup>

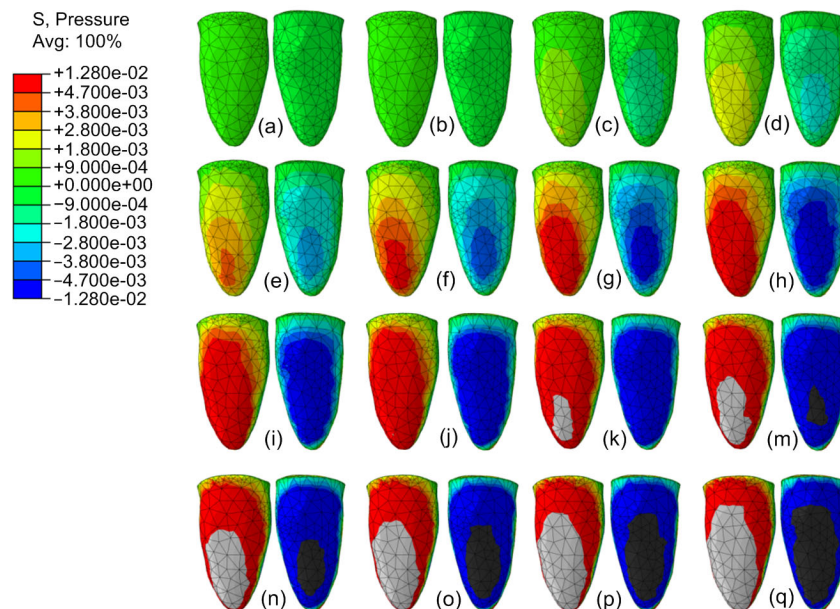

**Fig. S1 Hydrostatic stress distribution of canine PDL with distal-direction translation under force**  
(a) 0 g, (b) 10 g, (c) 20 g, (d) 30 g, (e) 45 g, (f) 60 g, (g) 75 g, (h) 95 g, (i) 115 g, (j) 135 g, (k) 160 g, (l) 185 g, (m) 210 g, (n) 240 g, (o) 270 g, (p) 300 g; The left is distal surface and right is mesial surface. Red and blue areas indicate compressive and tensile hydrostatic stress between 4.7 kPa (capillary pressure) and 12.8 kPa (80% of systolic pressure) while grey and black areas indicate compressive and tensile stress over 12.8 kPa, and other colors indicate stress between -4.7 kPa and 4.7 kPa

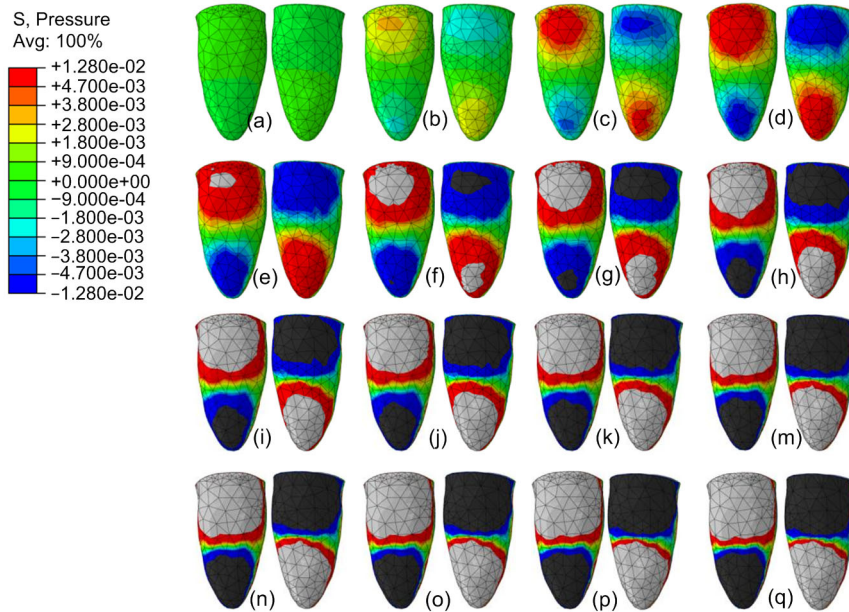

**Fig. S2 Hydrostatic stress distribution of canine PDL with distal-direction tipping movement under force**  
 (a) 0 g, (b) 10 g, (c) 20 g, (d) 30 g, (e) 45 g, (f) 60 g, (g) 75 g, (h) 95 g, (i) 115 g, (j) 135 g, (k) 160 g, (m) 185 g, (n) 210 g, (o) 240 g, (p) 270 g, (q) 300 g; The left is distal surface and right is mesial surface. Red and blue areas indicate compressive and tensile hydrostatic stress between 4.7 kPa (capillary pressure) and 12.8 kPa (80% of systolic pressure) while grey and black areas indicate compressive and tensile stress over 12.8 kPa, and other colors indicate stress between -4.7 kPa and 4.7 kPa

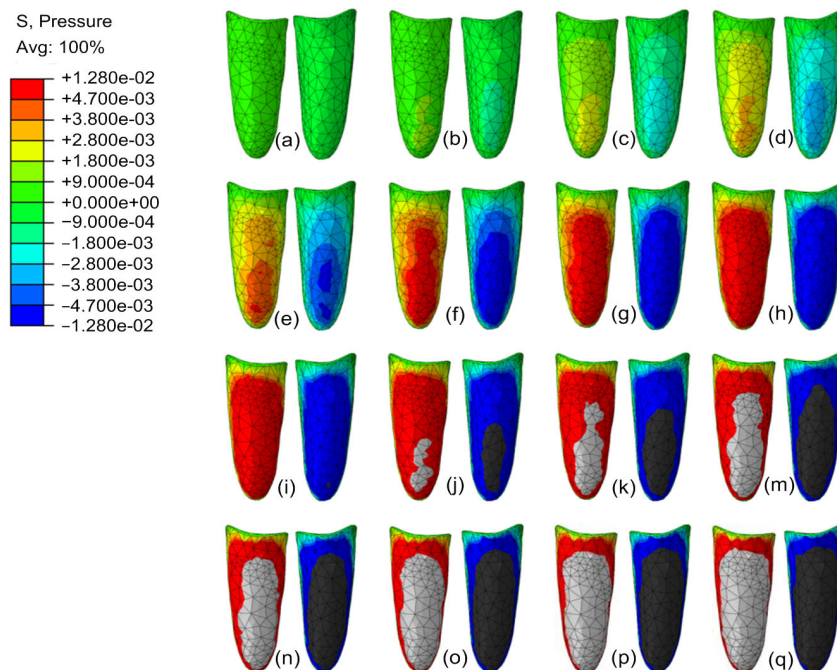

**Fig. S3 Hydrostatic stress distribution of canine PDL with labial-direction translation under force**  
 (a) 0 g, (b) 10 g, (c) 20 g, (d) 30 g, (e) 45 g, (f) 60 g, (g) 75 g, (h) 95 g, (i) 115 g, (j) 135 g, (k) 160 g, (m) 185 g, (n) 210 g, (o) 240 g, (p) 270 g, (q) 300 g; The left is labial surface and right is lingual surface. Red and blue areas indicate compressive and tensile hydrostatic stress between 4.7 kPa (capillary pressure) and 12.8 kPa (80% of systolic pressure) while grey and black areas indicate compressive and tensile stress over 12.8 kPa, and other colors indicate stress between -4.7 kPa and 4.7 kPa

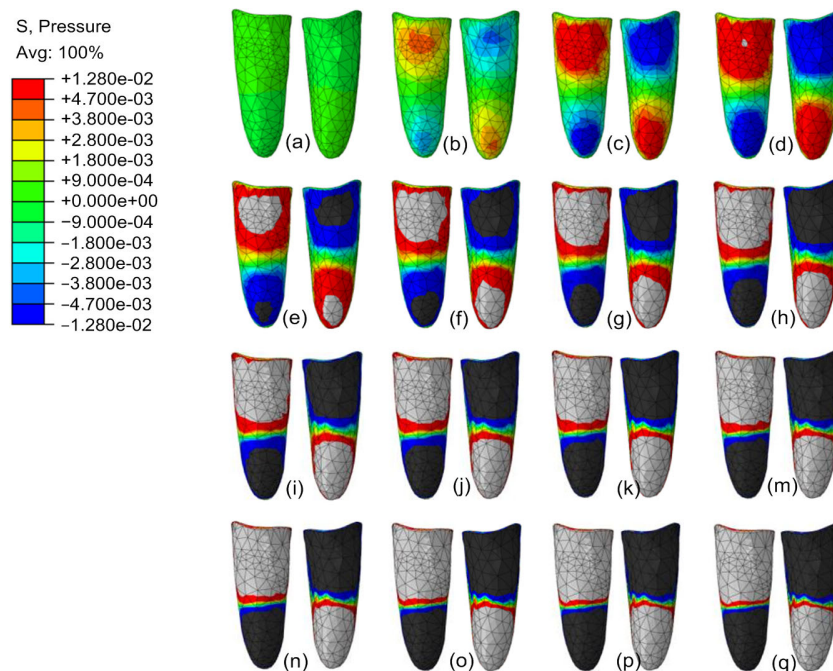

**Fig. S4 Hydrostatic stress distribution of canine PDL with labial-direction tipping movement under force**  
 (a) 0 g, (b) 10 g, (c) 20 g, (d) 30 g, (e) 45 g, (f) 60 g, (g) 75 g, (h) 95 g, (i) 115 g, (j) 135 g, (k) 160 g, (m) 185 g, (n) 210 g, (o) 240 g, (p) 270 g, (q) 300 g; The left is labial surface and right is lingual surface. Red and blue areas indicate compressive and tensile hydrostatic stress between 4.7 kPa (capillary pressure) and 12.8 kPa (80% of systolic pressure) while grey and black areas indicate compressive and tensile stress over 12.8 kPa, and other colors indicate stress between -4.7 kPa and 4.7 kPa

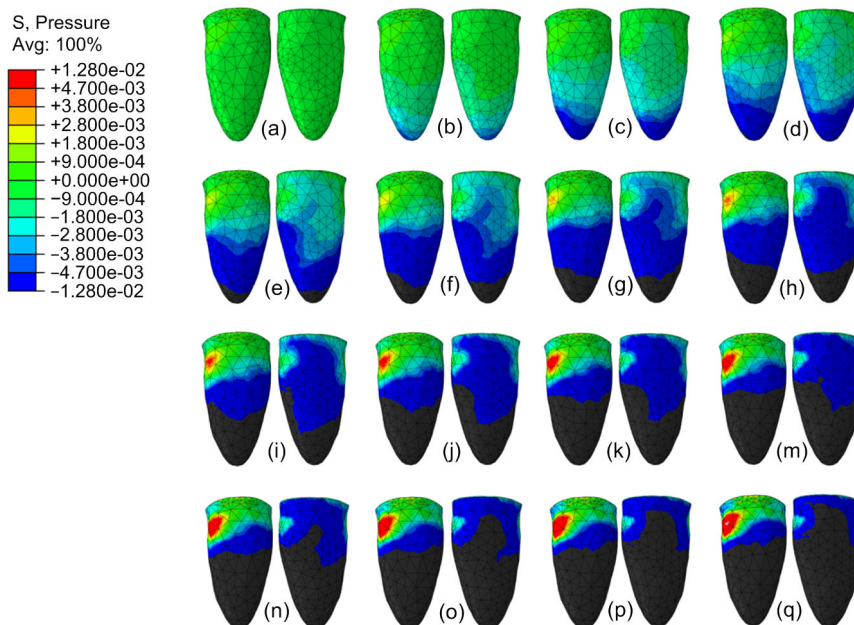

**Fig. S5 Hydrostatic stress distribution of canine PDL with extrusion under force**  
 (a) 0 g, (b) 10 g, (c) 20 g, (d) 30 g, (e) 45 g, (f) 60 g, (g) 75 g, (h) 95 g, (i) 115 g, (j) 135 g, (k) 160 g, (m) 185 g, (n) 210 g, (o) 240 g, (p) 270 g, (q) 300 g; The left is distal surface and right is mesial surface. Red and blue areas indicate compressive and tensile hydrostatic stress between 4.7 kPa (capillary pressure) and 12.8 kPa (80% of systolic pressure) while grey and black areas indicate compressive and tensile stress over 12.8 kPa, and other colors indicate stress between -4.7 kPa and 4.7 kPa



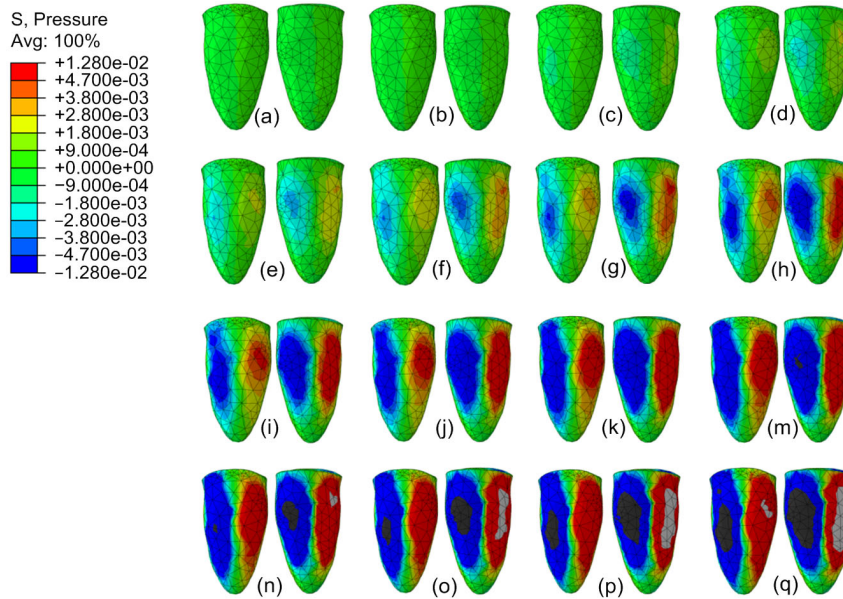

**Fig. S6 Hydrostatic stress distribution of canine PDL with rotation around long axis under force moment**  
 (a) 0 g·mm, (b) 10 g·mm, (c) 20 g·mm, (d) 30 g·mm, (e) 45 g·mm, (f) 60 g·mm, (g) 75 g·mm, (h) 95 g·mm, (i) 115 g·mm, (j) 135 g·mm, (k) 160 g·mm, (m) 185 g·mm, (n) 210 g·mm, (o) 240 g·mm, (p) 270 g·mm, (q) 300 g·mm; The left is distal surface and right is mesial surface. Red and blue areas indicate compressive and tensile hydrostatic stress between 4.7 kPa (capillary pressure) and 12.8 kPa (80% of systolic pressure) while grey and black areas indicate compressive and tensile stress over 12.8 kPa, and other colors indicate stress between -4.7 kPa and 4.7 kPa

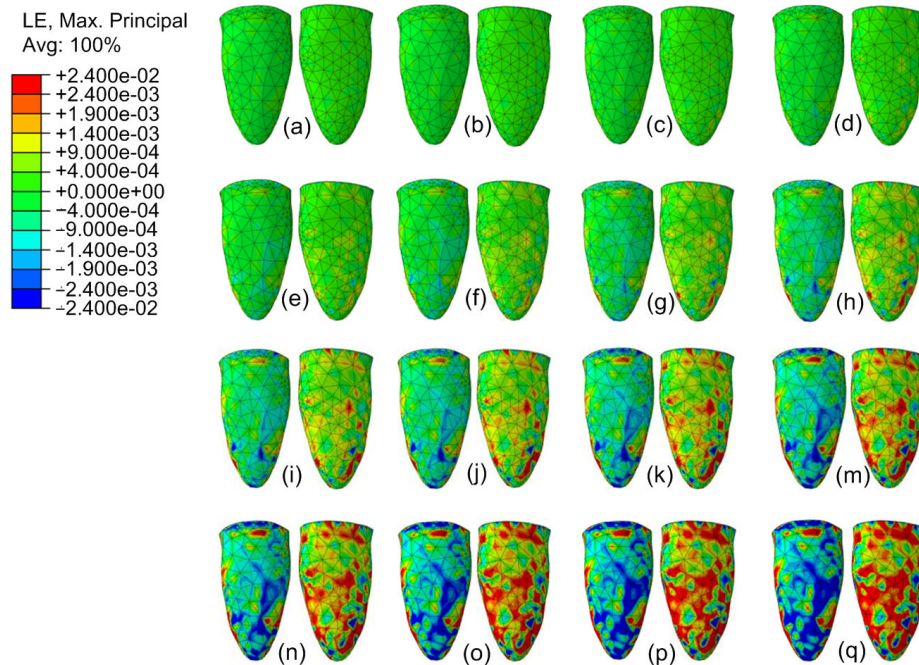

**Fig. S7 Logarithmic strain distribution of canine PDL with distal-direction translation under force**  
 (a) 0 g, (b) 10 g, (c) 20 g, (d) 30 g, (e) 45 g, (f) 60 g, (g) 75 g, (h) 95 g, (i) 115 g, (j) 135 g, (k) 160 g, (m) 185 g, (n) 210 g, (o) 240 g, (p) 270 g, (q) 300 g; The left is distal surface and right is mesial surface. Red and blue areas indicate tensile and compressive strain over 0.24% (80% of peak strain during canine maximal moving velocity)

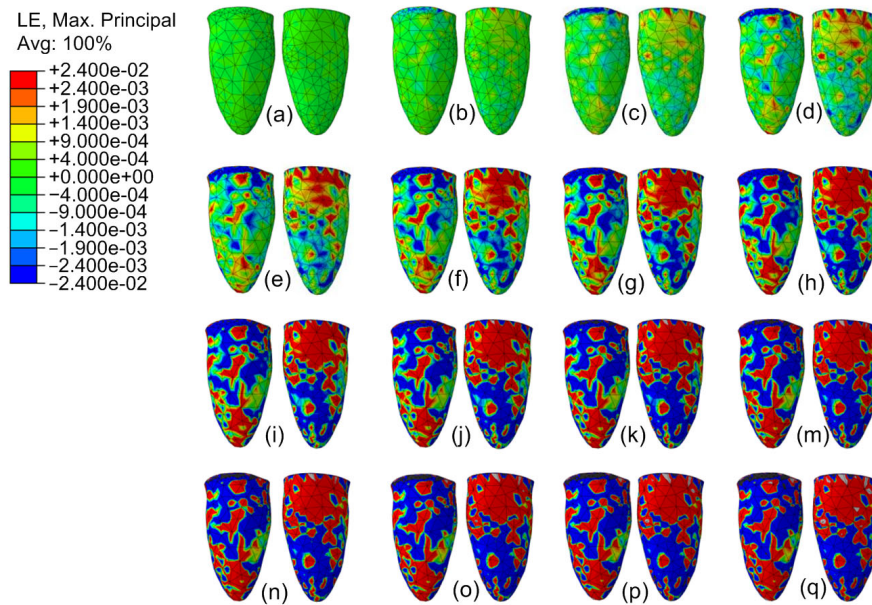

**Fig. S8 Logarithmic strain distribution of canine PDL with distal-direction tipping movement under force** (a) 0 g, (b) 10 g, (c) 20 g, (d) 30 g, (e) 45 g, (f) 60 g, (g) 75 g, (h) 95 g, (i) 115 g, (j) 135 g, (k) 160 g, (m) 185 g, (n) 210 g, (o) 240 g, (p) 270 g, (q) 300 g; The left is distal surface and right is mesial surface. Red and blue areas indicate tensile and compressive strain over 0.24% (80% of peak strain during canine maximal moving velocity)

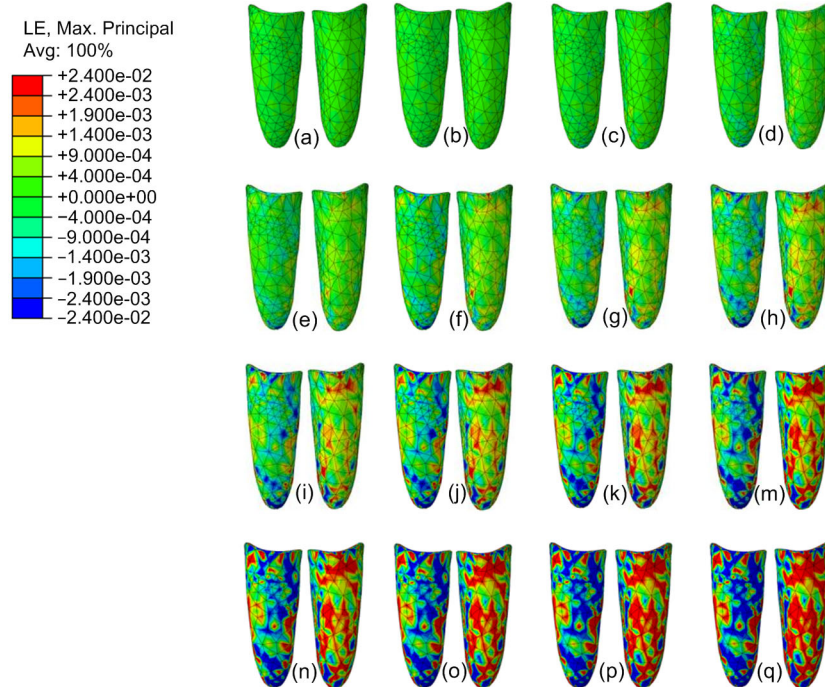

**Fig. S9 Logarithmic strain distribution of canine PDL with labial-direction translation under force** (a) 0 g, (b) 10 g, (c) 20 g, (d) 30 g, (e) 45 g, (f) 60 g, (g) 75 g, (h) 95 g, (i) 115 g, (j) 135 g, (k) 160 g, (m) 185 g, (n) 210 g, (o) 240 g, (p) 270 g, (q) 300 g; The left is labial surface and right is lingual surface. Red and blue areas indicate tensile and compressive strain over 0.24% (80% of peak strain during canine maximal moving velocity)



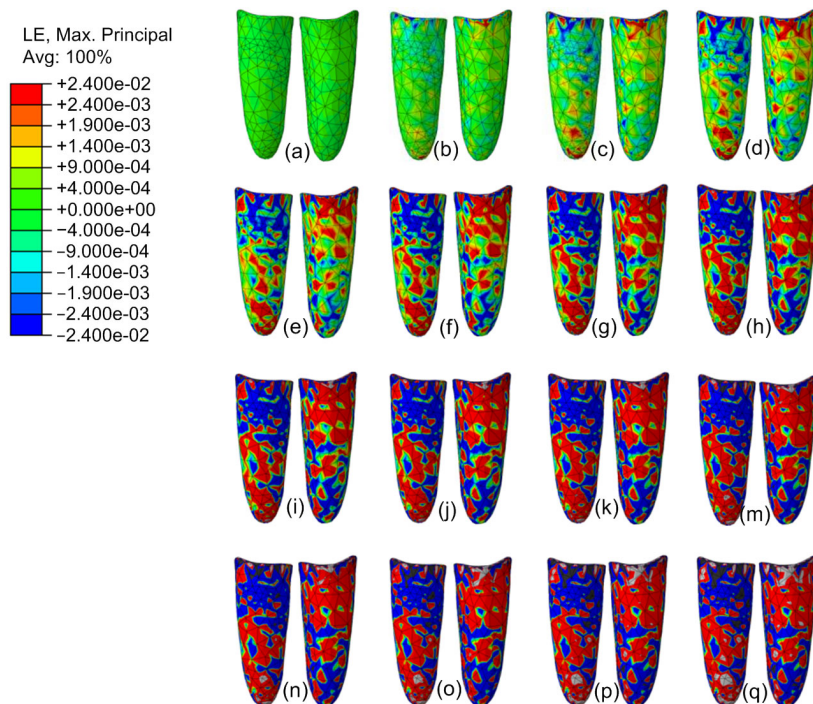

**Fig. S10 Logarithmic strain distribution of canine PDL with labial-direction tipping movement under force** (a) 0 g, (b) 10 g, (c) 20 g, (d) 30 g, (e) 45 g, (f) 60 g, (g) 75 g, (h) 95 g, (i) 115 g, (j) 135 g, (k) 160 g, (m) 185 g, (n) 210 g, (o) 240 g, (p) 270 g, (q) 300 g; The left is labial surface and right is lingual surface. Red and blue areas indicate tensile and compressive strain over 0.24% (80% of peak strain during canine maximal moving velocity)

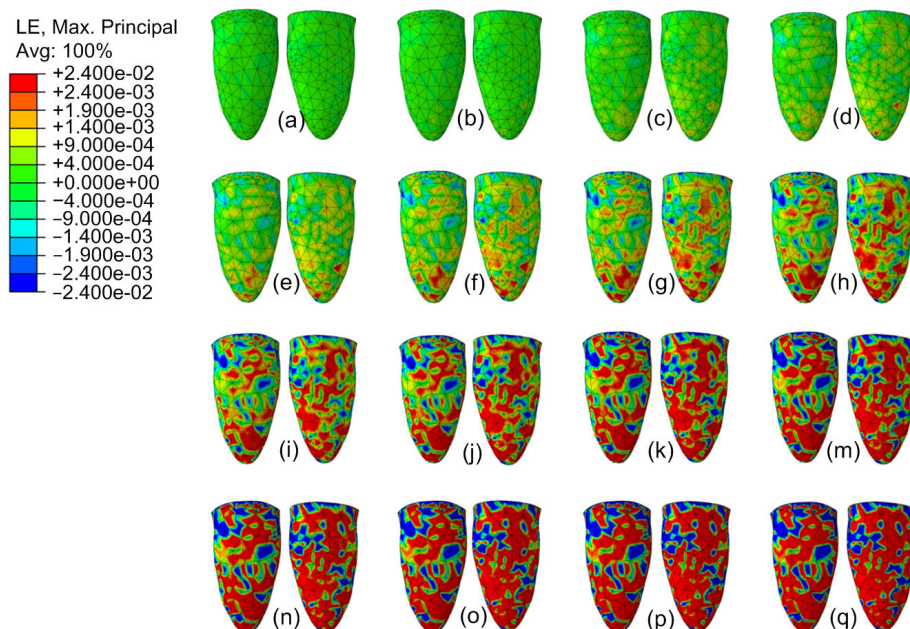

**Fig. S11 Logarithmic strain distribution of canine PDL with extrusion under force** (a) 0 g, (b) 10 g, (c) 20 g, (d) 30 g, (e) 45 g, (f) 60 g, (g) 75 g, (h) 95 g, (i) 115 g, (j) 135 g, (k) 160 g, (m) 185 g, (n) 210 g, (o) 240 g, (p) 270 g, (q) 300 g; The left is distal surface and right is mesial surface. Red and blue areas indicate tensile and compressive strain over 0.24% (80% of peak strain during canine maximal moving velocity)

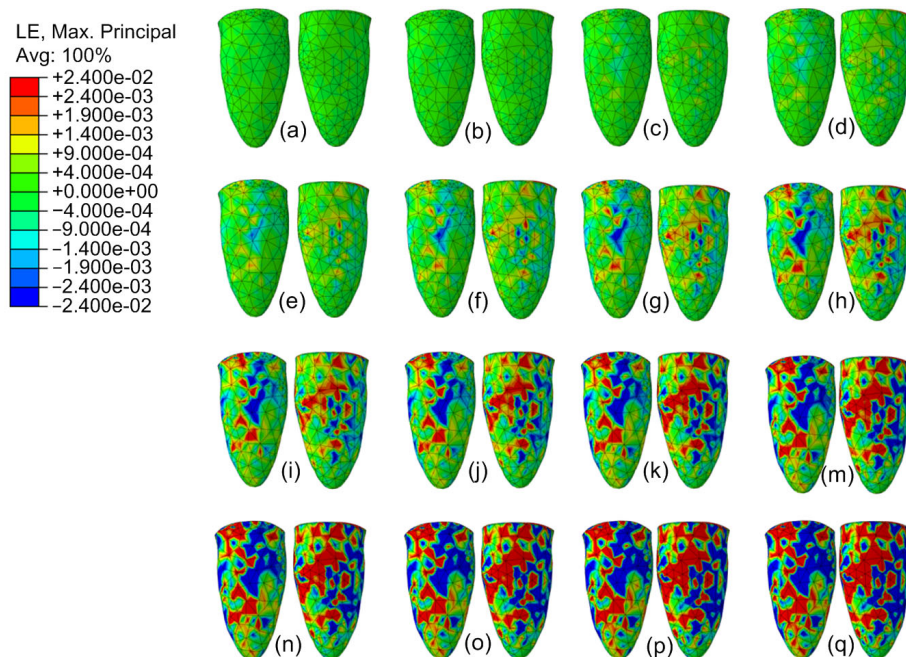

**Fig. S12 Logarithmic strain distribution of canine PDL with rotation around long axis under force moment**  
 (a) 0 g·mm, (b) 10 g·mm, (c) 20 g·mm, (d) 30 g·mm, (e) 45 g·mm, (f) 60 g·mm, (g) 75 g·mm, (h) 95 g·mm, (i) 115 g·mm, (j) 135 g·mm, (k) 160 g·mm, (m) 185 g·mm, (n) 210 g·mm, (o) 240 g·mm, (p) 270 g·mm, (q) 300 g·mm; The left is distal surface and right is mesial surface. Red and blue areas indicate tensile and compressive strain over 0.24% (80% of peak strain during canine maximal moving velocity)
